# Supplementary material
Source: Springer Nature journal article supplement (https://www.springermedizin.de/resource/supplementary/12943_2014_1357_MOESM1_ESM.pdf/9552774)
Supplement: MOESM1 [file 9552774]

**A**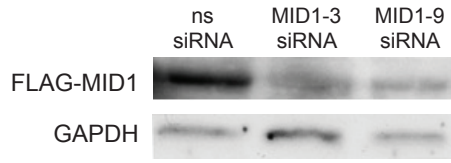**B**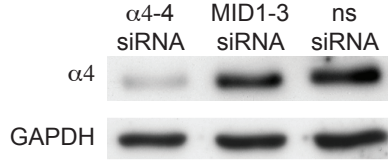**C**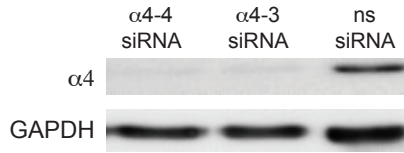**D**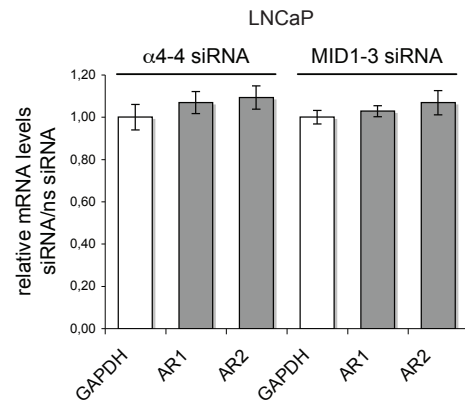**E**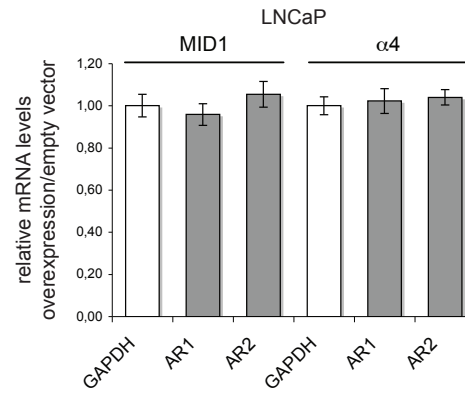

**Legend to supplemental Figure 1:**

(A) Westernblot as knockdown control for MID1-3 and MID1-9 siRNAs shown by reduction of FLAG-tagged MID1 overexpressed in LNCaP cells, (B,C) Westernblots as knockdown-controls for the  $\alpha$ 4-3 and  $\alpha$ 4-4 siRNAs using an antibody against endogenous  $\alpha$ 4 in LNCaP cells (D) Real-Time PCR analysis of AR mRNA levels in LNCaP cells after knockdown of MID1 or  $\alpha$ 4 relative to the non-silencing controls. (E) Real-Time PCR analysis of AR mRNA levels in LNCaP cells after over-expression of MID1 or  $\alpha$ 4 relative to the control (empty vector).
